# Supplementary material for: CD38 Expression in a Subset of Memory T Cells Is Independent of Cell Cycling as a Correlate of HIV Disease Progression
Source: Hindawi journal article supplement (doi:10.1155/2016/9510756), 2016-01-01
Supplement: f1 [file 9510756.f1.pdf]

### A. Antibody panel for phenotyping

| Specificity | Fluorochrome                        | Detector | Clone         | Volume                    | Isotype        | Origin                    |
|-------------|-------------------------------------|----------|---------------|---------------------------|----------------|---------------------------|
| CD4         | APC-Cy7                             | 780/60   | RPA-T4        | 1 µl                      | Mouse IgG1, κ  | BD Biosciences            |
| CD45RO      | Biotin-Streptavidin<br>PE Texas Red | 610/20   | UCHL1         | 0.5 µl /25<br>µl (1:1000) | Mouse IgG2a, κ | Biolegend/ BD Biosciences |
| CCR7        | PE-Cy7                              | 780/60   | 3D12          | 5 µl                      | Rat IgG2a, κ   | BD Biosciences            |
| CXCR3       | PE                                  | 575/26   | 1C6/CXC<br>R3 | 20 µl                     | Mouse IgG1, κ  | BD Biosciences            |
| CXCR5       | PerCP-Cy5.5                         | 695/40   | J252D4        | 1.25 µl                   | Mouse IgG1, κ  | Biolegend                 |
| CCR4        | Alexa Fluor 647                     | 660/20   | 1G1           | 1 µl                      | Mouse IgG1, κ  | BD Biosciences            |
| CD38        | Alexa Fluor 700                     | 730/45   | HIT2          | 2 µl                      | Mouse IgG1, κ  | Biolegend                 |
| Ki67        | FITC                                | 530/30   | B56           | 20 µl                     | Mouse IgG1, κ  | BD Biosciences            |

*\*BD Biosciences, San Jose, California, USA. \*\*Biolegend, San Diego, California, USA)*

B. Composition of the controls for the detection of each parameter

| Antibody                       | Control for CCR7  | Control for CXCR5        | Control for CD45RO                  | Control for CXCR3 | Control for CD38  | Control for CCR4   | control for Ki67 |
|--------------------------------|-------------------|--------------------------|-------------------------------------|-------------------|-------------------|--------------------|------------------|
| CD4-APC-CY7                    | ✓                 | ✓                        | ✓                                   | ✓                 | ✓                 | ✓                  | ✓                |
| CD45RO-Biotin+SAV-PE-Texas Red | ✓                 | ✓                        | Biotin mouse IgG2a+SAV-PE-Texas Red | ✓                 |                   | ✓                  |                  |
| CCR7-Pe Cy7                    | PE-CY7 rat IgG 2a | ✓                        |                                     |                   |                   | ✓                  |                  |
| CXCR5-PerCP-Cy5.5              | ✓                 | PerCP CY5.5-mouse IgG 2b |                                     |                   | ✓                 |                    |                  |
| CCR4-Alexa Fluor 647           |                   | ✓                        |                                     |                   | ✓                 | AF-647 mouse IgG 1 |                  |
| CXCR3-Pe                       | ✓                 | ✓                        | ✓                                   | Pe-mouse IgG 1K   |                   |                    |                  |
| CD38-Alexa Fluor 700           |                   |                          |                                     |                   | AF-700 mouse IgG1 |                    |                  |
| Ki67-FITC                      |                   |                          |                                     |                   |                   |                    | FITC-mouse IgG1  |

“✓” indicates the inclusion of the specific antibody (left) in the control for the variable indicated as the column heading. Gray cells indicate that a specific antibody was not necessary in the control because compensation sufficed to eliminate completely the spill-over signal from a particular fluorochrome-conjugated antibody (left).
